# Supplementary material for: Transcultural Adaptation and Psychometric Properties of the Persian Version of the Nursing Student Competence Scale (NSCS)
Source: PubMed Central journal article supplement — SAGE Open Nurs. 2024 Nov 22;10:23779608241299275. doi: 10.1177/23779608241299275 (PMC11583270; doi:10.1177/23779608241299275), 2024-11-22
Supplement: sj-pdf-2-son-10.1177_23779608241299275.pdf [file sj-pdf-2-son-10.1177_23779608241299275.pdf]

## Nursing Student Competence Scale

The purpose of this questionnaire is to investigate the degree of core competencies in nursing students. Please read each item carefully and then evaluate each item. Each item is scored using a 5-point Likert scale, with higher scale scores associated with greater nursing competence. Please select the answer that best fits your actual idea and hit "√" on the corresponding number.

| Items                                |                                                                                                            | Not Agree | Somewhat Agree | Agree | Quite Agree | Highly Agree |
|--------------------------------------|------------------------------------------------------------------------------------------------------------|-----------|----------------|-------|-------------|--------------|
| <b>Medical related knowledge</b>     |                                                                                                            |           |                |       |             |              |
| 1                                    | I can explain the meaning of the clinical examination                                                      | 1         | 2              | 3     | 4           | 5            |
| 2                                    | I can explain the meaning of the laboratory test                                                           | 1         | 2              | 3     | 4           | 5            |
| 3                                    | I can recognize the treatments and strategies of common diseases.                                          | 1         | 2              | 3     | 4           | 5            |
| 4                                    | I can accurately assessment the effect of medical treatment.                                               | 1         | 2              | 3     | 4           | 5            |
| 5                                    | I can manage the symptoms related to the alteration of patients' condition                                 | 1         | 2              | 3     | 4           | 5            |
| <b>Basic nursing skills</b>          |                                                                                                            |           |                |       |             |              |
| 6                                    | I can stay of execution of basic nursing skills                                                            | 1         | 2              | 3     | 4           | 5            |
| 7                                    | I can observe patients' privacy and needs                                                                  | 1         | 2              | 3     | 4           | 5            |
| 8                                    | I can proceed physical assessment to confirm patients' health issues                                       | 1         | 2              | 3     | 4           | 5            |
| 9                                    | I can provide individual care for patients                                                                 | 1         | 2              | 3     | 4           | 5            |
| 10                                   | I can have loyalty on nursing care                                                                         | 1         | 2              | 3     | 4           | 5            |
| <b>Communication and cooperation</b> |                                                                                                            |           |                |       |             |              |
| 11                                   | I can provide clear and specific instruction on nursing care                                               | 1         | 2              | 3     | 4           | 5            |
| 12                                   | I can proceed effectively communicate to improve patients' health problems                                 | 1         | 2              | 3     | 4           | 5            |
| 13                                   | I can fully communicate with family to improve patients' health.                                           | 1         | 2              | 3     | 4           | 5            |
| 14                                   | I can participate in care provided by multidisciplinary medical professionals                              | 1         | 2              | 3     | 4           | 5            |
| 15                                   | I can help patients and their caregivers to identify the support and resources from different professional | 1         | 2              | 3     | 4           | 5            |

| <b>Life-long learning</b> |                                                                                                                                  |   |   |   |   |   |
|---------------------------|----------------------------------------------------------------------------------------------------------------------------------|---|---|---|---|---|
| 16                        | I can have attitude to active learning innovative knowledge                                                                      | 1 | 2 | 3 | 4 | 5 |
| 17                        | I can take the initiative to attend courses promoting nursing professional                                                       | 1 | 2 | 3 | 4 | 5 |
| 18                        | I can face personal difficulties with self-reflection and find strategies for improvement                                        | 1 | 2 | 3 | 4 | 5 |
| 19                        | I can effectively do time management to improve personal growth                                                                  | 1 | 2 | 3 | 4 | 5 |
| 20                        | I can understand and plan self-development of personal nursing career                                                            | 1 | 2 | 3 | 4 | 5 |
| <b>Global vision</b>      |                                                                                                                                  |   |   |   |   |   |
| 21                        | I can understand the global trend of diseases, treatments, and health issues                                                     | 1 | 2 | 3 | 4 | 5 |
| 22                        | I can understand the innovative knowledge about nursing clinical practice and research                                           | 1 | 2 | 3 | 4 | 5 |
| 23                        | I can understand the development of foreign and domestic nursing care                                                            | 1 | 2 | 3 | 4 | 5 |
| 24                        | I can perceive global and trans-cultural issues                                                                                  | 1 | 2 | 3 | 4 | 5 |
| 25                        | I can practice nursing work with multi-cultural perspective                                                                      | 1 | 2 | 3 | 4 | 5 |
| <b>Critical thinking</b>  |                                                                                                                                  |   |   |   |   |   |
| 26                        | I can have ability of independently proceeding critical thinking.                                                                | 1 | 2 | 3 | 4 | 5 |
| 27                        | I can use fundamental medical knowledge and logical thinking to revise care process.                                             | 1 | 2 | 3 | 4 | 5 |
| 28                        | I can assess health problems with consideration of personal different circumstance and provide appropriate nursing interventions | 1 | 2 | 3 | 4 | 5 |
| 29                        | I can arrange work with considering the priority of patients' health problems                                                    | 1 | 2 | 3 | 4 | 5 |
| 30                        | I can manage patients' health problem with application of the last evidence outcomes or creative thinking                        | 1 | 2 | 3 | 4 | 5 |
